1 **IMPACT OF DRUG RESISTANCE IN ASCARIDIA**

2 **Impact of fenbendazole resistance in *Ascaridia dissimilis* on the economics of production in**  
3 **turkeys**

4 James B. Collins<sup>\*,1</sup>, Brian Jordan<sup>†</sup>, Anand N. Vidyashankar<sup>‡</sup>, Pablo Jimenez Castro<sup>\*,2</sup>, Ray M.  
5 Kaplan<sup>\*</sup>

6 <sup>\*</sup>University of Georgia, Dept. of Infectious Diseases, College of Veterinary Medicine, 501 DW  
7 Brooks Dr, Athens, GA, USA 30602

8 1. Corresponding Author: 501 DW Brooks Dr, Athens, GA 30601, Work:7065420742,  
9 Cell:7062470020

10 2. Co-Affiliation: Grupo de Parasitologia Veterinaria, Universidad Nacional de  
11 Colombia, Bogotá, Colombia 1100100

12 <sup>†</sup>University of Georgia, Poultry Diagnostic and Research Center, Department of Population  
13 Health, College of Veterinary Medicine and the Department of Poultry Science, College of  
14 Agricultural and Environmental Sciences, 953 College Station Rd, Athens, GA, USA 30602

15 <sup>‡§</sup>George Mason University, Department of Statistics, Nguyen Engineering Building, 1715  
16 4400 University Drive, MS 4A7, Fairfax, VA, USA 22030

17 **Corresponding Author:** James B. Collins, 501 DW Brooks Dr, Athens, GA 30601,  
18 Work:7065420742, Cell:7062470020

19 **Scientific Section:** Health and Disease, Metabolism and Nutrition

20

21

22

## 23 **ABSTRACT**

24           Feed conversion efficiency is among the most important factors affecting profitable  
25 production of poultry. Infections with parasitic nematodes can decrease efficiency of production,  
26 making parasite control through the use of anthelmintics an important component of health  
27 management. In ruminants and horses, anthelmintic resistance is highly prevalent in many of the  
28 most important nematode species, which greatly impacts their control. Recently, we identified  
29 resistance to fenbendazole in an isolate of *Ascaridia dissimilis*, the most common intestinal  
30 helminth of turkeys. Using this drug-resistant isolate, we investigated the impact that failure to  
31 control infections has on weight gain and feed conversion in growing turkeys. Birds were  
32 infected on Day 0 with either a fenbendazole-susceptible or -resistant isolate, and then half were  
33 treated with fenbendazole (SafeGuard<sup>®</sup> Aquasol) at 4- and 8-weeks post infection. Feed intake  
34 and bird weight were measured for each pen weekly throughout the study, and feed conversion  
35 rate was calculated. Necropsy was performed on birds from each treatment group to assess worm  
36 burdens at weeks 7 and 9 post infection. In the birds infected with the susceptible isolate,  
37 fenbendazole-treated groups had significantly better feed conversion as compared to untreated  
38 groups. In contrast, there were no significant differences in feed conversion between the  
39 fenbendazole-treated and untreated groups in the birds infected with the resistant isolate. At both  
40 weeks 7 and 9, worm burdens were significantly different between the treated and untreated  
41 birds infected with the drug-susceptible isolate, but not in the birds infected with the drug-  
42 resistant isolate. These significant effects on feed conversion were seen despite having a rather  
43 low worm establishment in the birds. Overall, these data indicate that *A. dissimilis* can produce  
44 significant reductions in feed conversion, and that failure of treatment due to the presence of  
45 fenbendazole-resistant worms can have a significant economic impact on turkey production.

46 Furthermore, given the low worm burdens and an abbreviated grow out period of this study, the  
47 levels of production loss we measured may be an underestimate of the true impact that  
48 fenbendazole-resistant worms may have on a commercial operation.

49 **KEYWORDS**

50 *Ascaridia*, benzimidazoles, anthelmintic resistance, feed conversion, turkey

51 **1.INTRODUCTION**

52 Both helminth and protozoan parasites can impact poultry performance parameters such  
53 as weight gain and/or feed conversion ratio (FCR) (Voeten, Braunius et al. 1988, Daş, Kaufmann  
54 et al. 2010, Sharma, Hunt et al. 2019). Feed conversion, a measure of feed consumption per unit  
55 of production accounts for approximately 70% of production costs, making it among the most  
56 important factors affecting profitable production (Willems, Miller et al. 2013). A lower feed  
57 conversion ratio (FCR) indicates that feed is being more efficiently utilized for growth. While  
58 coccidia (*Eimeria* spp.) are well documented as important parasitic pathogens of poultry,  
59 helminths generally receive much less attention. Several studies in chickens have shown that  
60 infections with *Ascaridia galli* have a negative impact on both feed efficiency and egg quality  
61 (Daş, Kaufmann et al. 2010, Stehr, Grashorn et al. 2019). However, less work has been done  
62 investigating this issue in turkeys infected with *Ascaridia dissimilis*.

63 *Ascaridia dissimilis* is the most prevalent and one of the most important parasites of  
64 turkeys, with up to 100% of a flock being infected (Yazwinski, Tucker et al. 2009). *Ascaridia*  
65 eggs are capable of surviving the environmental extremes that are present in poultry houses and  
66 may remain infective for periods exceeding six months, leading to a cycle of continuous  
67 reinfection and environmental contamination with new eggs (Cauthen 1931, Tarbiat, Jansson et

68 al. 2015). Heavy infections may cause clinical disease such as diarrhea, intestinal blockage, and  
69 enteritis, but most often infections are subclinical, only causing reduced feed efficiency (Ikeme  
70 1971, Norton, Hopkins et al. 1992, Yazwinski, Tucker et al. 2002). Given the potential health  
71 and production impacts of *Ascaridia*, as well as its near ubiquity, successful control will often be  
72 important for profitable production.

73         Currently, in the United States, fenbendazole is the only available treatment approved by  
74 the Food and Drug Administration for treatment of *Ascaridia* infections in poultry. Registration  
75 studies of fenbendazole (SafeGuard®) in feed, at 1mg/kg body weight for 6 days, demonstrated  
76 greater than 99% efficacy against *Ascaridia dissimilis* (United States Food and Drug  
77 Administration 2000). In addition, a formulation of fenbendazole that is administered in water,  
78 (SafeGuard® Aquasol), demonstrated a mean efficacy of 97.7% against *Ascaridia galli*, a closely  
79 related parasite of chickens, that may also infect turkeys (United States Food and Drug  
80 Administration 2018). On commercial turkey farms, treatments with fenbendazole are often  
81 administered frequently, around every 4 weeks, which is an interval less than the prepatent period  
82 of *A. dissimilis*. These treatments are typically administered in either feed or water to the entirety of  
83 the house. These means of drug delivery make accurate dosing challenging due to difficulty in  
84 optimal delivery of the drug and variability in consumption. Both issues may lead to sub-  
85 therapeutic levels of ingestion in some birds. In other livestock species, under-dosing is thought  
86 to be an important factor influencing the development of drug resistance in nematode parasites  
87 (Smith, Grenfell et al. 1999, Jackson and Coop 2000). A model investigating factors promoting  
88 the development of anthelmintic resistance showed that repeated under-dosing acted as a strong  
89 selector for resistance, since partially resistant heterozygotes were able to survive and reproduce  
90 (Smith, Grenfell et al. 1999). The survival of heterozygotes led to a much more rapid increase in

91 the frequency of resistant homozygotes in the population as compared to full-dose treatments  
92 that killed the heterozygotes with high efficacy. Under-dosing, combined with often intensive  
93 use in production animals, may act as strong selectors for the development of anthelmintic  
94 resistance in nematode parasites.

95 In many species of important livestock parasites, resistance to benzimidazoles is highly  
96 prevalent (Kaplan 2004, Howell, Burke et al. 2008, Kaplan and Vidyashankar 2012). Though  
97 reduced efficacy of fenbendazole was reported previously in *Ascaridia dissimilis*, (Yazwinski,  
98 Tucker et al. 2013) resistance to fenbendazole in *A. dissimilis* was only recently confirmed for  
99 the first time in a controlled efficacy study (Collins, Jordan et al. 2019). Following treatment  
100 with fenbendazole, a field isolate of *A. dissimilis* (Sn) yielded an efficacy of 63.9%, whereas in  
101 three other field isolates fenbendazole treatment yielded an efficacy of greater than 99%. Having  
102 demonstrated fenbendazole resistance in a naturally occurring field isolate of *Ascaridia*  
103 *dissimilis*, we wanted to measure the effects that resistant parasites may be having on production  
104 parameters as a consequence of failed treatments.

105

## 106 **2.MATERIALS AND METHODS**

### 107 ***2.1 Turkeys and feeding***

108 Four hundred and thirty-two, day old, Hybrid turkey poults were received from Prestage  
109 Farms and housed at the Poultry Science farm at the University of Georgia. Birds were allowed  
110 one week of acclimation before the study began. Water and feed were provided *ad libitum*. For  
111 the first 6 weeks, birds were fed a starter ration with 26% protein, then a grower ration with 23%  
112 protein was offered from weeks 6 to 9 (see Supplemental files 1 & 2 for the diet formulations).

### 113 ***2.2 Study Design***

114 Birds were received on Day -7 and were assigned to 36 pens of 12 birds each based on  
115 weight, minimizing differences in total weight between pens. 16 pens were infected with the  
116 resistant isolate, 16 pens were infected with the susceptible isolate, and 4 pens served as  
117 environmental controls. Groups were separated by floor to ceiling mesh curtains to prevent  
118 movement of birds between pens. Feed was added into hanging feeders and the initial weight of  
119 feeders for each pen was recorded. Each subsequent week, total bird weight for each pen and the  
120 weights of feeders were recorded to determine the weight gain and feed consumed. The hanging  
121 feeders were then refilled and an initial feeder weight for the next week was recorded. At weeks  
122 7 and 8 post infection (p.i.), groups were culled to 10 and 9 birds respectively, to maintain  
123 recommended stocking densities. The study was originally planned to continue for 16 weeks but  
124 was terminated at week 9 due to inability of the facilities to properly contain turkeys of this size.  
125 Birds were necropsied, and worm enumeration was performed on 8 and 16 birds for each  
126 treatment at weeks 7 and 9 p.i., respectively.

### 127 **2.3 Parasite Isolates**

128 Eggs from a resistant (Sn 3.1F2F) and a susceptible (Ow 3.0) isolate of *A. dissimilis* were  
129 obtained from passage of isolates whose drug susceptibility phenotypes were previously  
130 confirmed (Collins, Jordan et al. 2019). Briefly, feces containing *A. dissimilis* eggs were washed  
131 through a series of sieves, and then eggs were isolated by flotation using a solution with specific  
132 gravity of 1.15 and centrifuged at 433g for 7 mins. The supernatant was collected on a 32um  
133 mesh sieve and rinsed to remove flotation solution from eggs. Eggs were then stored in a tissue  
134 culture flask containing water and 0.5% formalin and stored at 25°C to allow development to the  
135 third stage larvae or infective stage.

### 136 **2.4 Infection and Treatment**

137 Starting on Day 0, 16 groups were infected with eggs of the resistant Sn 3.1F2F isolate  
138 (hereafter referred to as Sn) and 16 groups were infected with the susceptible Ow 3.0 isolate  
139 (hereafter referred to as Ow). Half of the groups infected with each isolate were then left  
140 untreated and half received treatment with fenbendazole at weeks 4 and 8 (p.i.). In addition, 4  
141 groups of 12 birds each were included as uninfected environmental sentinels.

142 Each week, fully larvated infective *A. dissimilis* eggs were mixed into feed at a target  
143 inoculum dose of 25 eggs per bird. 3600 fully developed infective eggs in a volume of 1 ml were  
144 pipetted onto 360 grams of feed, and the feed was then mixed well to disperse the eggs. Twenty  
145 gr aliquots of the egg-contaminated feed containing approximately 300 eggs were then delivered  
146 to each group each week by sprinkling on top of the fresh feed, adjusting to 250 and 225 total  
147 eggs as birds were culled at weeks 7 and 8 p.i.

148 At weeks 4 and 8, treated groups were administered fenbendazole for five consecutive  
149 days at a dosage of 1.25 mg/kg, which is 25% higher than the recommended label dose of 1.0  
150 mg/kg. This higher dose was provided to maximize the likelihood that all birds consumed the  
151 minimum full label dose. Treatment was administered using carboys delivering water to two side  
152 by side pens. Dosage was calculated based on the total bird weight for both pens, selected 1 day  
153 prior to the initiation of treatment. In order to maximize the likelihood that all birds would  
154 consume the full dosage, the fenbendazole was administered in 90% of the estimated volume of  
155 total daily water consumption. On all treatment days, the full volume of water containing the  
156 fenbendazole was consumed.

## 157 ***2.5 Statistical Analysis***

158 Statistical analyses were performed on weight gain and FCR values to model and identify  
159 the effect of treatment, specifically, comparing turkeys infected with Ow and Sn, respectively.

160 Data from both week 4 and week 5 was considered as baseline in separate analyses. To account  
161 for the growth across time, both linear and quadratic effects were introduced into the model.  
162 Likelihood based methods were used for statistical analyses.

163 Specifically, the fitted model for Weight gain data was:

$$164 \quad \text{Log (Weight gain) for a bird at a time} = \log (\text{baseline Weight gain}) \text{ bird} + b\_1(\text{time effect}) \\ 165 \quad + b\_2(\text{time effect})^2 + \text{treatment effect} + \text{bird effect} + \text{error}.$$

166 Conversely for FCR data was:

$$167 \quad \text{Log (FCR) for a bird at a time} = \log (\text{baseline FCR}) \text{ bird} + b\_1(\text{time effect}) + b\_2(\text{time effect}) \\ 168 \quad ^2 + \text{treatment effect} + \text{bird effect} + \text{error}.$$

169 The error was assumed to be normally distributed with mean 0 and variance that changed  
170 with the treatment group. The errors between time points were modeled as an autoregressive  
171 model of order 1 that changed across treatment groups. The bird effect was treated as a random  
172 effect that was normally distributed with mean zero and independent of the error. All models  
173 were selected using the Bayesian Information Criterion after considering several polynomial  
174 models for time and different covariance structures. The normality of the error distributions was  
175 evaluated using Shapiro-Wilks test.

176 The number of immature and adult worms recovered on day seven and day nine was  
177 statistically analyzed, separately, using negative binomial regression with the logarithmic link  
178 function. This model was chosen based on the likelihood criterion. In the analyses for adult  
179 worms, data for the treated Ow group was not used in the analysis since all the observations were  
180 zero. The model included the treatment group as an effect. All statistical comparisons were  
181 evaluated at a 5% level of significance.



182

### 3.RESULTS

183 Analyses for weight gain and feed conversion ratio were performed separately using either week  
184 4 or week 5 as baseline, with both analyses yielding consistent results. Week 5 was selected as  
185 the baseline for the results presented here, and results using week 4 as baseline are provided in  
186 Supplementary Tables 1 and 2.

187 **Weight Gain.** Based on the fitted model, the distribution of the errors was found to be  
188 normal (p-value=0.0871), and baseline was not a significant factor (p-value=0.3843). The slope  
189 for week was estimated to be -0.1154 (Std. Error=0.0810), and the slope for the square of time  
190 was estimated to be 0.0238 (Std. Error=0.0160), both of which were not significantly different  
191 from zero (p-values=0.1406, 0.1574). Weight gains (Table 1) were not significantly different  
192 between experimental groups (p-value=0.1283).

193 **Feed Conversion Ratio.** Based on the fitted model, the distribution of the errors was  
194 found to be normal (p-value=0.5040), and baseline was not a significant factor (p-value=0.6035).  
195 The slope for week was estimated to be 0.3571 (Std. Error= 0.0866) and slope for the square of  
196 time was estimated to be -0.0412 (Std. Error= 0.0171), both of which were significantly different  
197 from zero (p-values <0.0001, = 0.0179). Feed Conversion Ratio values are shown in Table 2 and  
198 Figure 1. Least square mean values for Feed Conversion Ratio (Table 3) differed overall between  
199 the groups (p-value=0.0036), therefore pairwise treatment comparisons were performed (Table  
200 4). Based on these results, there were significant differences (p-value=0.0030) between treated  
201 and untreated birds infected with the drug-susceptible isolate (Ow), and between treated birds  
202 infected with the susceptible (Ow) and resistant (Sn) isolates (p-value=0.0150). However, there  
203 were no significant differences (p-value=0.2600) between treated and untreated birds infected  
204 with the resistant isolate (Sn).

205           ***Worm Counts at Week 7.*** The treated Ow group had no adults recovered, thus no  
206 analyses were performed for this group. No significant differences were seen between the treated  
207 and untreated Sn groups (p-value=0.8138). Additionally, there were no significant differences in  
208 adult worms between the untreated Ow group and the untreated Sn (p-value=0.4832) or between  
209 the untreated Ow group and treated Sn groups (p-value=0.2652). There were significant  
210 differences between the untreated and treated groups in the number of immature worms  
211 recovered for both the Ow (p-value = 0.0112) and Sn groups (p-value =0.0204). However, there  
212 were no significant differences between the treated Ow and treated Sn groups in the number of  
213 immature worms recovered (p-value = 0.1452). Mean worm counts for each treatment group at  
214 Week 7 are shown (Table 5).

215           ***Worm Counts at Week 9.*** Very few adult worms were recovered from any of the groups  
216 and most birds had no adult worms. Accordingly, no significant differences in adult worms were  
217 noted. There were, however, significant differences in the number of immature worms between  
218 the untreated and treated groups for both Ow birds (p-value <0.0001) and Sn birds (p-value  
219 <0.0001). Additionally, significant differences were observed in the number of recovered  
220 immature worms between the treated Ow group and treated Sn group of birds (p-value <0.0001).  
221 Mean worm counts for each treatment group at Week 9 are shown (Table 5).

222

223

#### 4.DISCUSSION

224

225

226

227

To the best of our knowledge, here we report findings of the first study measuring the effects of drug-resistant *A. dissimilis* infection on turkeys. By infecting groups of birds with either a known fenbendazole-susceptible and known fenbendazole-resistant isolate, we were able to determine, using a mixed model for comparisons, the level of production loss caused by drug-

228 resistant parasites which were not removed by treatment. This model allowed for comparisons  
229 that accounted for the random variability of worm burdens, feed consumption, etc. For these  
230 comparisons, results were analyzed using both week 4 and week 5 as a baseline and no  
231 differences in statistical results were seen using either week as baseline. Thus, we used week 5 as  
232 baseline for all comparisons, as this was the point from which measurements would begin to  
233 diverge as a consequence of failed treatments due to the presence of resistant worms.

234 Significant differences seen in FCR between the treated and untreated drug-susceptible  
235 Ow groups indicate that the *A. dissimilis* infections were impairing FCR, and successful removal  
236 of the drug-susceptible worms by treatment led to higher feed efficiency. In contrast, treatment  
237 of birds infected with the drug-resistant Sn isolate did not yield an improvement in FCR.  
238 Interestingly, no differences were seen in weight gain between groups, highlighting that this  
239 effect on FCR is solely on feed consumption. Feed conversion efficiency is significantly  
240 diminished, but birds appear to have gorged themselves on feed, making up for any possible  
241 weight loss and driving FCR higher. Beginning in week 6 through the end of the study, the  
242 treated Ow groups consumed an average of 230 grams less feed per week per bird as compared  
243 to the treated Sn groups.

244 If the levels of production loss seen in this study due to the drug-resistant worms were  
245 extended to the level of a house of 10,000 birds, this difference in feed usage would translate to  
246 an extra 2.3 metric tons of feed needed per week. Using our feed cost of approximately \$275 US  
247 dollars/metric ton, this amounts to around \$635 in extra feed costs/per week. Our grow-out only  
248 lasted for 9 weeks, thus projections for a full grow-out if 16 weeks need to be made cautiously.  
249 However, if this difference is projected onto a full 16 week grow-out, starting from week 5, total

250 extra feed costs due to effects of *A. dissimilis* on FCR for a 10,000-bird house would be  
251 approximately \$6,985.

252         The rather large differences recorded in FCR in this study are even more dramatic when  
253 viewed in light of the low worm burdens achieved in this study. In a previous study with *A.*  
254 *dissimilis* performed in commercial houses, mean worm burden from natural infections at day 56  
255 post-infection was 13 adult worms per bird (Yazwinski, Rosenstein et al. 1993). In our recent  
256 study, mean worm burdens from a bolus infection administered by gavage averaged 18.3 adult  
257 worms per bird in untreated birds (Collins, Jordan et al. 2019). In contrast, at week 7 in our  
258 current study (49 days post-infection), our untreated groups had average adult worm burdens per  
259 bird of only 8.5 and 7.9 for Sn and Ow, respectively. This is only around 25% of what was seen  
260 in the Yazwinski study at a similar time point, and around 44% of the burden seen in our  
261 previous study. An estimated 200 total eggs per bird were given both in our previous, as well as  
262 the current study. In the present study, our infection protocol was designed to replicate the trickle  
263 infection birds would be expected to experience in a commercial house, however it failed to  
264 produce the worm burdens seen in these previous studies. Despite this, we were still able to  
265 determine the effects of treatment of worm burden in our treatment groups.

266         At week 7, in agreement with the significantly improved FCR, no adult parasites were  
267 recovered from necropsy of Ow-Treated birds, indicating the high efficacy of fenbendazole  
268 against this susceptible isolate by eliminating 100% of the adult burden. The few immature  
269 parasites recovered from this group are most likely due to reinfection in the intervening post  
270 treatment period. At this same time point, there were no significant differences in worm burdens  
271 between treated and untreated Sn groups, and both had significantly higher adult worm burdens  
272 than the treated Ow group, but not the Ow untreated group indicating the inability of treatment to

273 control parasites of the resistant isolate. This lack of control is in agreement with the lack of  
274 improvement seen in FCR at this time point.

275         Although we were able to detect an impact on feed conversion, larger worm burdens  
276 more typical of natural infections are needed to determine the full scale of drug-resistant worms  
277 on FCR. It seems likely that higher worm burdens would have produced even greater negative  
278 impacts on FCR than what are reported here. In addition to burdens, rearing time likely also  
279 plays an important role in the effects on FCR. Longer grow out times with continual reinfection  
280 due to environmental contamination with infective eggs, may lead to heavier burdens and  
281 therefore increase the impacts. Due to limitations of our research space, which was designed for  
282 chickens, it was necessary to prematurely terminate the study after 9 weeks. This contrasts to the  
283 typical commercial grow out of 16-20 weeks. With a longer grow out period, it is possible that  
284 the effects on FCR would continue or worsen causing further costs associated with resistant  
285 parasites. Little is known about the population dynamics of *A. dissimilis*, and these dynamics,  
286 would likely play a large role in determining the effects of resistant parasites in a full grow-out.  
287 Additional studies will be needed to address this issue.

288         Overall, our data suggests that fenbendazole-resistant *A. dissimilis* have the potential to  
289 impart substantial economic losses in the production of commercial turkeys. Presently, the  
290 prevalence of resistance to fenbendazole is unknown, but may be much higher than is currently  
291 realized (Collins, Jordan et al. 2019). Taken together, the results of our two recent studies  
292 highlight the need for surveillance of resistance in helminths of poultry, for developing strategies  
293 to prevent the development of drug resistance, and for developing strategies to address the  
294 presence of drug resistant worms on a farm. Additional studies that better replicate the grow-out  
295 time and worm infection levels that are typical on commercial turkey farms are needed to gain a

296 more accurate and full measure of the economic impacts of resistant *Ascaridia dissimilis* on  
297 turkey production.

298

## 299 **5. CONCLUSION**

300 This study highlights the fact that *A. dissimilis* can significantly impact the economy of turkey  
301 production even with low sub-clinical levels of infection. Thus, drug-resistant *A. dissimilis* have  
302 the potential to significantly impact the production economy of turkeys.

303

## 304 **ACKNOWLEDGEMENTS**

305 We would like to thank Dr. Justin Fowler for formulation the starter and grower ration. We  
306 would also like to thank Sue Howell, Dr. Kelsey Paras, Mikayla Bazemore, Kyle Harris, Patricia  
307 Weatherly, Dr. Cassan Pulaski, Will Van Brackle, Abbey Malatesta and Dr. Daniel Zuluaga for  
308 their assistance in multiple phases of this study.

309

310 This project was supported by a grant from the US Poultry and Egg Association (project #F081)

311

## 312 **ETHICAL STATEMENT**

313 All birds were handled under protocols approved by the University of Georgia Institutional  
314 Animal Care and Use Committee (IACUC) under animal use policy A2019 01-005-Y2-A1.

315

## 316 **REFERENCES**

317 Cauthen, G. E. (1931). Some studies on the viability and development of the ova of *Ascaridia*  
318 *lineata* (Schneiler).

319 Collins, J. B., B. Jordan, L. Baldwin, C. Hebron, K. Paras, A. N. Vidyashankar and R. M. Kaplan  
320 (2019). "Resistance to fenbendazole in *Ascaridia dissimilis*, an important nematode parasite of  
321 turkeys." *Poult Sci* **98**(11): 5412-5415.

322 Daş, G., F. Kaufmann, H. Abel and M. Gaulty (2010). "Effect of extra dietary lysine in *Ascaridia*  
323 *galli*-infected grower layers." *Veterinary Parasitology* **170**(3): 238-243.

324 Howell, S. B., J. M. Burke, J. E. Miller, T. H. Terrill, E. Valencia, M. J. Williams, L. H.  
325 Williamson, A. M. Zajac and R. M. Kaplan (2008). "Prevalence of anthelmintic resistance on  
326 sheep and goat farms in the southeastern United States." *J Am Vet Med Assoc* **233**(12): 1913-  
327 1919.

328 Ikeme, M. M. (1971). "Observations on the pathogenicity and pathology of *Ascaridia galli*."  
329 *Parasitology* **63**(2): 169-179.

330 Jackson, F. and R. L. Coop (2000). "The development of anthelmintic resistance in sheep  
331 nematodes." *Parasitology* **120 Suppl**: S95-107.

332 Kaplan, R. M. (2004). "Drug resistance in nematodes of veterinary importance: a status report."  
333 *TRENDS in Parasitology* **20**(10): 476-481.

334 Kaplan, R. M. and A. N. Vidyashankar (2012). "An inconvenient truth: global worming and  
335 anthelmintic resistance." *Vet Parasitol* **186**(1-2): 70-78.

336 Norton, R. A., B. A. Hopkins, J. K. Skeeles, J. N. Beasley and J. M. Kreeger (1992). "High  
337 Mortality of Domestic Turkeys Associated with *Ascaridia dissimilis*." *Avian Diseases* **36**(2):  
338 469-473.

339 Sharma, N., P. W. Hunt, B. C. Hine and I. Ruhnke (2019). "The impacts of *Ascaridia galli* on  
340 performance, health, and immune responses of laying hens: new insights into an old problem."  
341 *Poult Sci* **98**(12): 6517-6526.

342 Smith, G., B. T. Grenfell, V. Isham and S. Cornell (1999). "Anthelmintic resistance revisited:  
343 under-dosing, chemoprophylactic strategies, and mating probabilities." International Journal for  
344 Parasitology **29**(1): 77-91.

345 Stehr, M., M. Grashorn, D. Dannenberger, A. Tuchscherer, M. Gauly, C. C. Metges and G. Das  
346 (2019). "Resistance and tolerance to mixed nematode infections in relation to performance level  
347 in laying hens." Vet Parasitol **275**: 108925.

348 Tarbiat, B., D. S. Jansson and J. Hoglund (2015). "Environmental tolerance of free-living stages  
349 of the poultry roundworm *Ascaridia galli*." Vet Parasitol **209**(1-2): 101-107.

350 United States Food and Drug Administration (2000). New Animal Drug Application 131-675. O.  
351 o. N. A. D. Application. Rockville, MD, US Food & Drug Administration.

352 United States Food and Drug Administration (2018). New Animal Drug Application 141-449. O.  
353 o. N. A. D. Evaluation. Rockville, MD, US Food & Drug Administration.

354 Voeten, A. C., W. W. Braunius, F. W. Orthel and M. A. van Rijen (1988). "Influence of  
355 coccidiosis on growth rate and feed conversion in broilers after experimental infections with  
356 *Eimeria acervulina* and *Eimeria maxima*." Vet Q **10**(4): 256-264.

357 Willems, O. W., S. P. Miller and B. J. Wood (2013). "Aspects of selection for feed efficiency in  
358 meat producing poultry." World's Poultry Science Journal **69**(1): 77-88.

359 Yazwinski, T. A., M. Rosenstein, R. D. Schwartz, K. Wilson and Z. Johnson (1993). "The use of  
360 fenbendazole in the treatment of commercial turkeys infected with *Ascaridia dissimilis*." Avian  
361 Pathology **22**(1): 177-181.

362 Yazwinski, T. A., C. Tucker, A. Stelzleni, Z. Johnson, J. Robins, K. Downum, M. Fincher, J.  
363 Matlock and H. D. Chapman (2002). "Subclinical effects and fenbendazole treatment of turkey  
364 ascaridiasis under simulated field conditions." Avian Diseases **46**(4): 886-892.



365 Yazwinski, T. A., C. A. Tucker, J. Reynolds, Z. Johnson and D. Pyle (2009). "Efficacies of  
366 fenbendazole and levamisole in the treatment of commercial turkeys for *Ascaridia dissimilis*  
367 infections." The Journal of Applied Poultry Research **18**(2): 318-324.

368 Yazwinski, T. A., C. A. Tucker, E. Wray, L. Jones and F. D. Clark (2013). "Observations of  
369 benzimidazole efficacies against *Ascaridia dissimilis*, *Ascaridia galli*, and *Heterakis gallinarum*  
370 in naturally infected poultry." The Journal of Applied Poultry Research **22**(1): 75-79.

371 **Table 1. Weight Gain (kgs) for each treatment group by week. There were no significant**  
372 **differences in weight gain between the groups.**

| Week | Treatment  |              |            |              |
|------|------------|--------------|------------|--------------|
|      | Ow-Treated | Ow-Untreated | Sn-Treated | Sn-Untreated |
| 1    | 0.14       | 0.15         | 0.16       | 0.16         |
| 2    | 0.20       | 0.21         | 0.17       | 0.21         |
| 3    | 0.33       | 0.36         | 0.34       | 0.35         |
| 4    | 0.43       | 0.45         | 0.45       | 0.44         |
| 5    | 0.44       | 0.54         | 0.48       | 0.49         |
| 6    | 0.70       | 0.63         | 0.71       | 0.65         |
| 7    | 0.77       | 0.79         | 0.80       | 0.83         |
| 8    | 0.56       | 0.70         | 0.61       | 0.64         |
| 9    | 0.72       | 0.77         | 0.89       | 0.76         |

373

374

375

376

377 **Table 2. Feed conversion ratio for each group by week. Feed conversion was calculated as**  
378 **kilograms of feed divided by weight gain.**

---

| Week | Treatment  |              |            |              |
|------|------------|--------------|------------|--------------|
|      | Ow-Treated | Ow-Untreated | Sn-Treated | Sn-Untreated |
| 1    | 1.26       | 1.21         | 1.16       | 1.18         |
| 2    | 1.30       | 1.34         | 1.82       | 1.32         |
| 3    | 1.50       | 1.46         | 1.40       | 1.48         |
| 4    | 1.55       | 1.56         | 1.52       | 1.64         |
| 5    | 2.04       | 1.77         | 1.87       | 2.01         |
| 6    | 1.71       | 2.01         | 1.83       | 1.94         |
| 7    | 1.74       | 2.12         | 2.05       | 2.01         |
| 8    | 2.59       | 2.90         | 2.98       | 3.16         |
| 9    | 2.48       | 2.83         | 2.58       | 2.82         |

---

379

380

381

382

383

384

385

386

387

388

389

390 **Figure 1. FCR for each treatment group over time.**

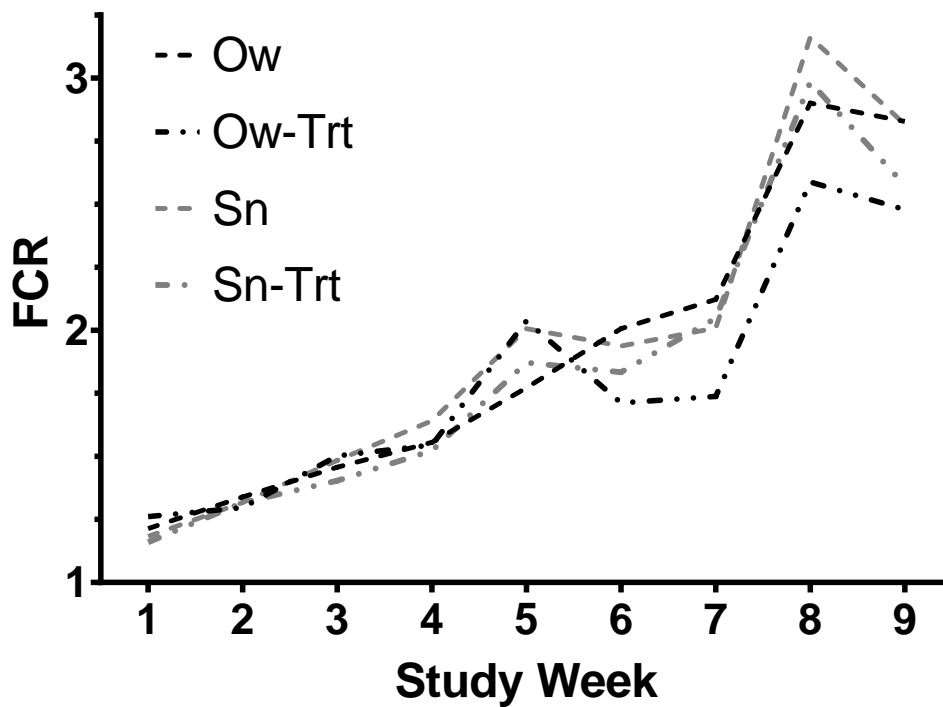

391

392 **Table 3. Least square means for FCR of each treatment group.**

| Treatment    | Estimate | Standard Error |
|--------------|----------|----------------|
| Ow-Treated   | 0.7241   | 0.02995        |
| Ow-Untreated | 0.8645   | 0.02917        |
| Sn-Treated   | 0.831    | 0.02762        |
| Sn-Untreated | 0.8755   | 0.02663        |

393

394 **Table 4. Pairwise comparisons for differences in least square means for FCR.**

| Comparison                   | Estimate | Standard Error | Pr > t |
|------------------------------|----------|----------------|--------|
| Ow-Untreated vs. Ow- Treated | 0.1404   | 0.04311        | 0.003  |
| Ow-Treated vs. Sn-Treated    | -0.1069  | 0.04113        | 0.015  |
| Sn-Treated vs. Sn-Untreated  | 0.04452  | 0.03869        | 0.26   |

395 **Table 5. Mean worm counts by group at Week 7 and Week 9. For each treatment group, 8**  
396 **birds were necropsied at week 7, and 16 birds were necropsied at week 9. Statistically**  
397 **significant groups are designated. No analysis was done on total worm burdens.**

| <b>Group</b> | <b>Week 7</b>      |                   |              | <b>Week 9</b>      |                   |              |
|--------------|--------------------|-------------------|--------------|--------------------|-------------------|--------------|
|              | <b>Immature</b>    | <b>Adults</b>     | <b>Total</b> | <b>Immature</b>    | <b>Adults</b>     | <b>Total</b> |
| Ow-Treated   | 1.88 <sup>c</sup>  | 0.00 <sup>b</sup> | 1.88         | 0.13 <sup>b</sup>  | 0.00 <sup>b</sup> | 0.13         |
| Ow-Untreated | 4.50 <sup>ab</sup> | 3.38 <sup>a</sup> | 7.88         | 10.94 <sup>a</sup> | 0.38 <sup>a</sup> | 11.31        |
| Sn-Treated   | 3.13 <sup>bc</sup> | 2.25 <sup>a</sup> | 5.38         | 8.38 <sup>a</sup>  | 1.06 <sup>a</sup> | 9.44         |
| Sn-Untreated | 6.00 <sup>a</sup>  | 2.50 <sup>a</sup> | 8.50         | 11.13 <sup>a</sup> | 0.44 <sup>a</sup> | 11.56        |

398

399
